# Supplementary material for: Structural characterization of interactions between transactivation domain 1 of the p65 subunit of NF-κB and transcription regulatory factors
Source: PubMed Central journal article supplement — Nucleic Acids Res. 2017 Feb 28;45(9):5564–76. doi: 10.1093/nar/gkx146 (PMC5435986; doi:10.1093/nar/gkx146), 2017-02-28
Supplement: gkx146_Supp.pdf [file gkx146_Supp.pdf]

## Supplementary Figures:

### Structural characterization of interactions between transactivation domain 1 of the p65 subunit of NF- $\kappa$ B and transcription regulatory factors.

Lauriane Lecoq<sup>1</sup>, Luca Raiola<sup>1</sup>, Philippe R. Chabot<sup>1</sup>, Normand Cyr<sup>1</sup>, Geneviève Arseneault<sup>1</sup>, Pascale Legault<sup>1</sup> and James G. Omichinski<sup>1</sup>

<sup>1</sup> Department of Biochemistry and Molecular Medicine, Université de Montréal, Montréal, QC, H3C 3J7, Canada

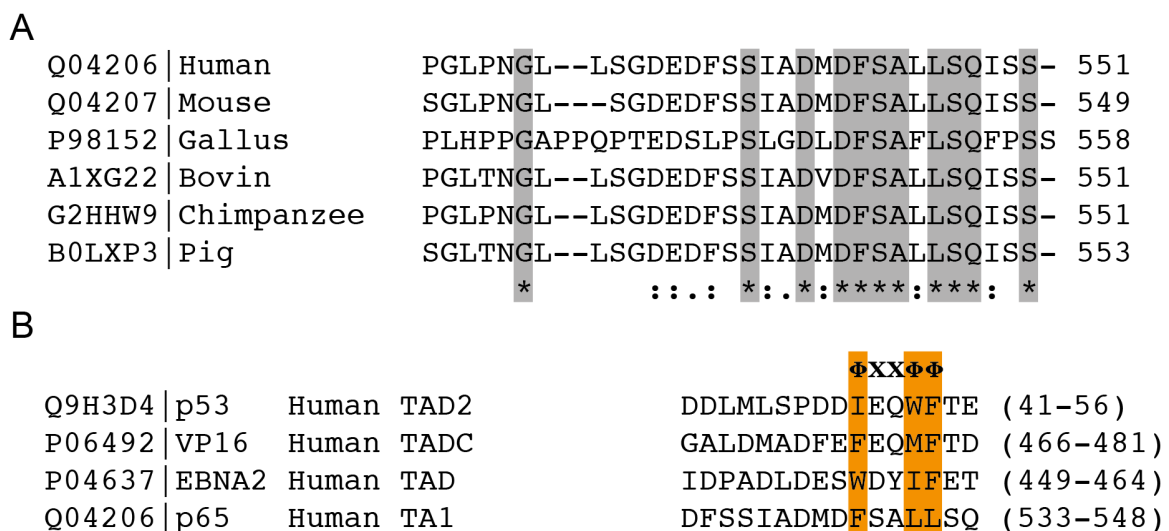

**Supplementary Figure 1. Conservation of the  $\Phi$ XX $\Phi$  $\Phi$  motif among species and transactivation domains.** (A) Alignment of p65<sub>TA1</sub> sequences from six different species. Grey color together with the stars indicates full sequence conservation, while the dots indicate moderate sequence conservation. UniProt numbers are indicated on the left. (B) Sequence alignment of the acidic transactivation domains of p53, VP16, EBNA2 and p65<sub>TA1</sub>. The alignment is based on the  $\Phi$ XX $\Phi$  $\Phi$  motif indicated at the top.  $\Phi$  hydrophobic residues are highlighted in orange.

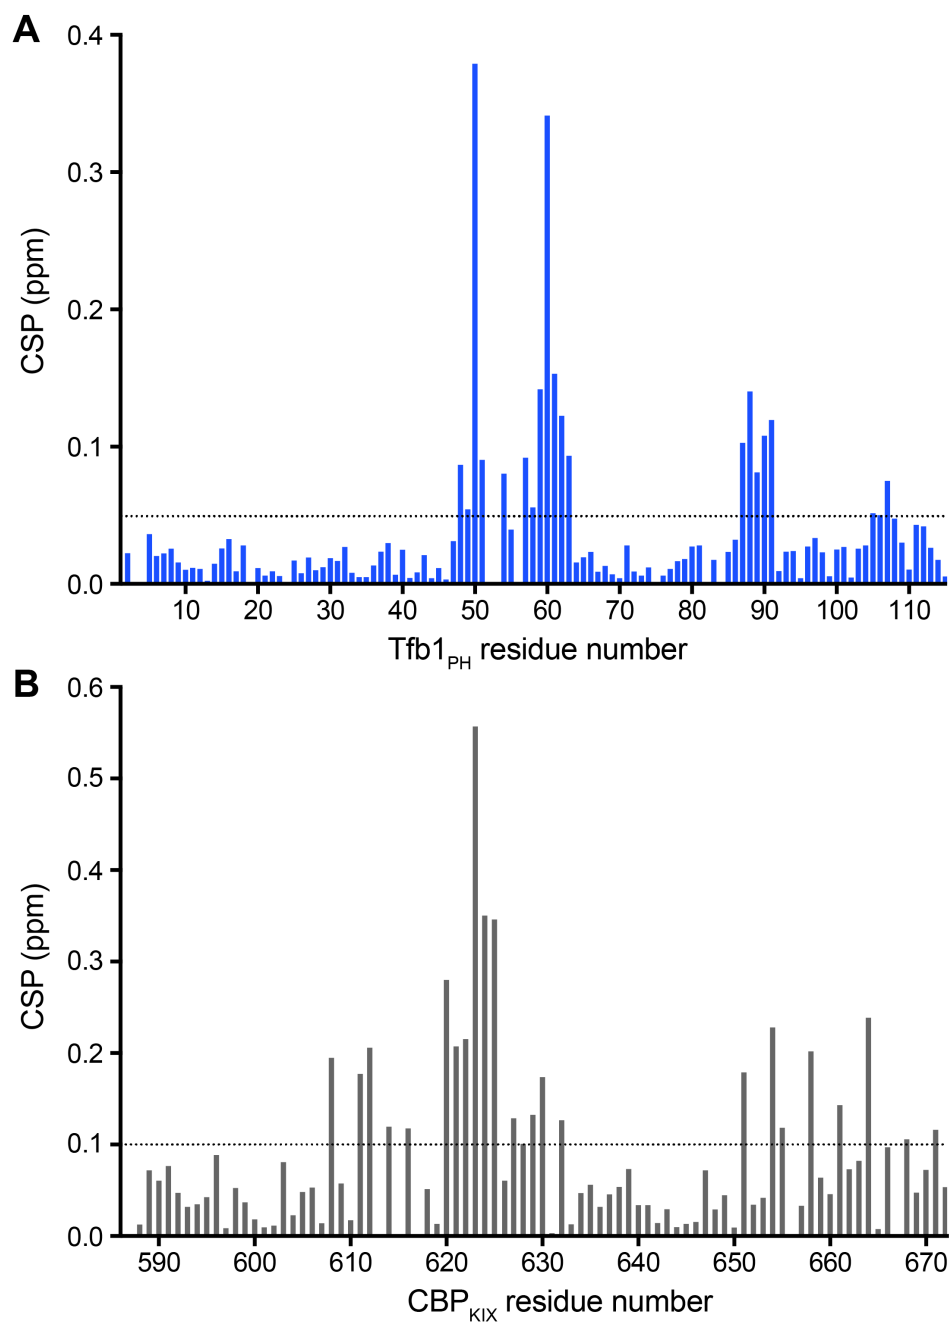

**Supplementary Figure 2.  $^1\text{H}$ - $^{15}\text{N}$  chemical shift perturbations (CSP) induced by the binding of p65<sub>TA1</sub> to Tfb1<sub>PH</sub> (A) and CBP<sub>KIX</sub> (B).** In both cases, 3 equivalents of p65<sub>TA1</sub> were added to 700  $\mu\text{M}$  of Tfb1<sub>PH</sub>/CBP<sub>KIX</sub> in 20 mM NaPO<sub>4</sub> buffer at pH 6.5 in 10% D<sub>2</sub>O / 90% H<sub>2</sub>O.  $^1\text{H}$  and  $^{15}\text{N}$  chemical shift changes were monitored in 2D  $^1\text{H}$ - $^{15}\text{N}$  HSQC spectra at 25 °C.  $^1\text{H}$ - $^{15}\text{N}$  CSPs were calculated as:  $\Delta\delta = \sqrt{(\Delta\delta_H)^2 + (0.17 \Delta\delta_N)^2}$  where  $\Delta\delta_H$  and  $\Delta\delta_N$  represent the respective variation of  $^1\text{H}$  and  $^{15}\text{N}$  chemical shifts after the addition of p65<sub>TA1</sub>. Missing data correspond to proline residues which don't provide signal in the  $^1\text{H}$ - $^{15}\text{N}$  HSQC spectrum, as well as H3 and A53 in Tfb1<sub>PH</sub> and G586, V587 and K667 in CBP<sub>KIX</sub>. CSPs are considered as significant when their value is above the dotted lines, *i.e.* 0.05 ppm for Tfb1<sub>PH</sub>-p65<sub>TA1</sub> complex and 0.1 ppm for CBP<sub>KIX</sub>-p65<sub>TA1</sub> complex.

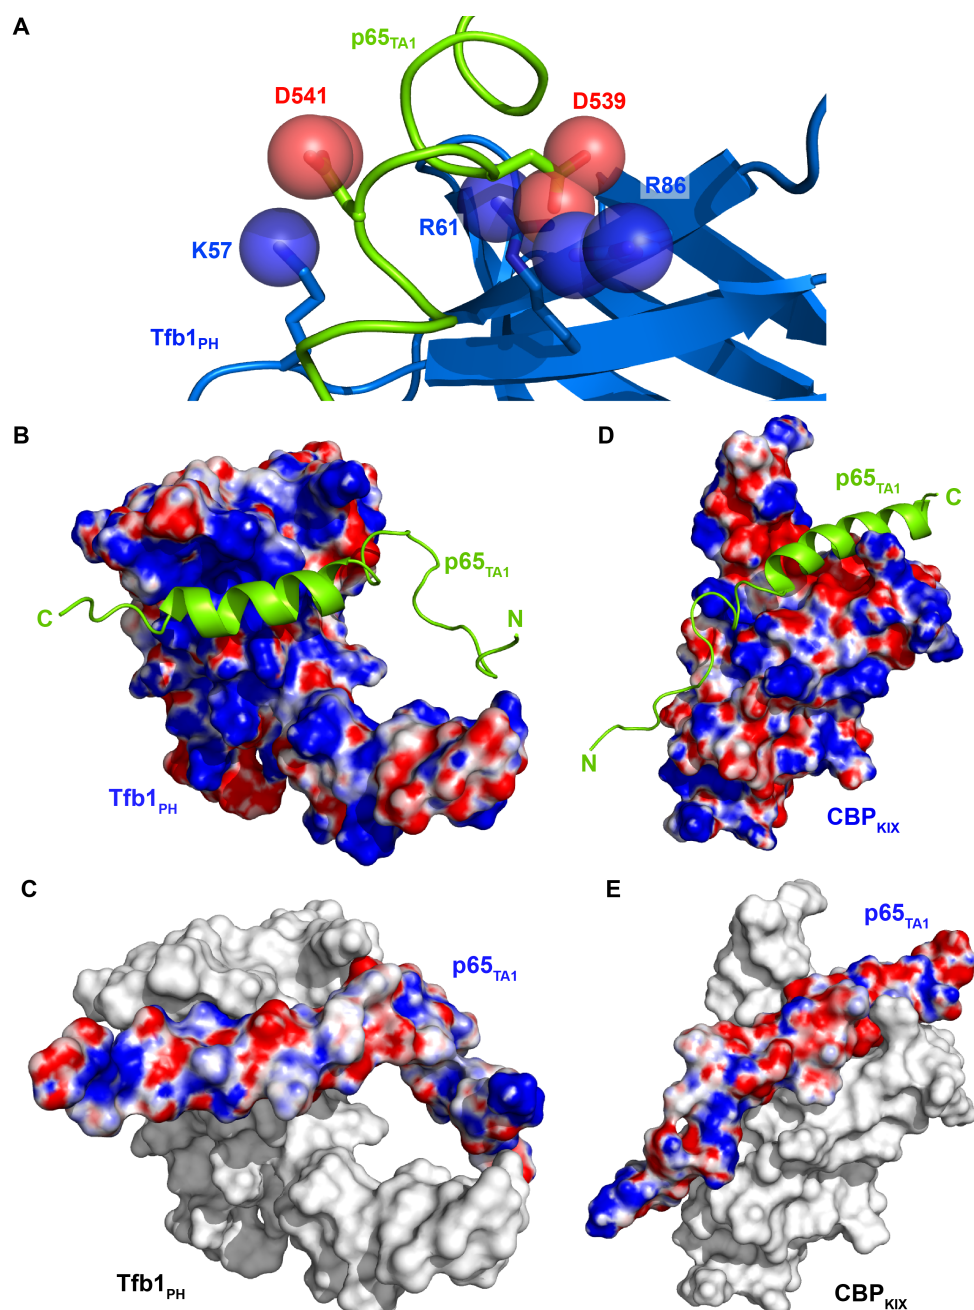

**Supplementary Figure 3. Electrostatic interactions in Tfb1<sub>PH</sub>-p65<sub>TA1</sub> and CBP<sub>KIX</sub>-p65<sub>TA1</sub> complexes.** (A) Close-up view of potential electrostatic interactions between D539 of p65<sub>TA1</sub> and either R61 or R86 of Tfb1<sub>PH</sub>, as well as between D541 of p65<sub>TA1</sub> and K57 of Tfb1<sub>PH</sub>. (B) Electrostatic surface potential of Tfb1<sub>PH</sub> in the Tfb1<sub>PH</sub>-p65<sub>TA1</sub> complex, where p65<sub>TA1</sub> is represented as cartoon for clarity. This electrostatic surface potential shows that the cleft where F542 of p65<sub>TA1</sub> anchors is highly positive on Tfb1<sub>PH</sub>. The color scale is set from -10 kT/e (red) to 10 kT/e (blue), and electrostatic potentials were calculated with the default parameters on <http://www.charmm-gui.org/>, using the Poisson-Boltzmann equation. (C) Electrostatic surface potential of p65<sub>TA1</sub> in the Tfb1<sub>PH</sub>-p65<sub>TA1</sub> complex, where Tfb1<sub>PH</sub> is represented as a neutral surface for clarity. (D) Electrostatic surface potential of CBP<sub>KIX</sub> in the CBP<sub>KIX</sub>-p65<sub>TA1</sub> complex, where p65<sub>TA1</sub> is represented as cartoon, showing that p65<sub>TA1</sub> is surrounded by both negatively and positively charged regions. (E) Electrostatic surface potential of p65<sub>TA1</sub> in the CBP<sub>KIX</sub>-p65<sub>TA1</sub> complex, where CBP<sub>KIX</sub> is represented as a neutral surface.

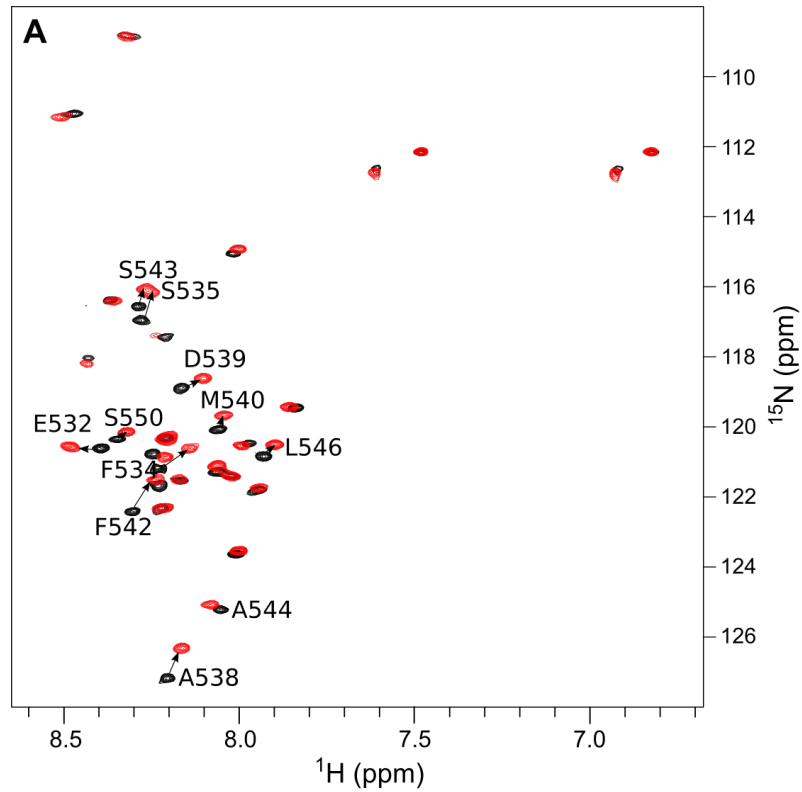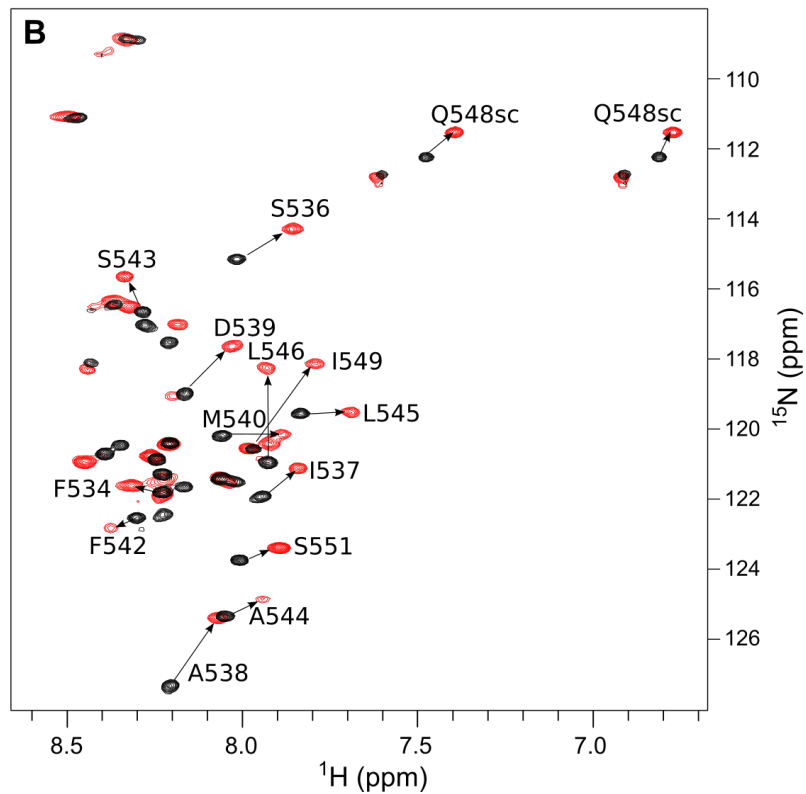

**Supplementary Figure 4.** Overlay of the 2D  $^1\text{H}$ - $^{15}\text{N}$ -HSQC NMR spectra of  $^{13}\text{C}$ - $^{15}\text{N}$ - p65<sub>TA1</sub> either in the absence (black) or in the presence (red) of 2 equivalents of (A) Tfb1<sub>PH</sub> and (B) CBP<sub>KIX</sub>. Residues with significant chemical shift perturbation upon binding are labeled and the shift is indicated by arrow.
